# Supplementary material for: Direct studies on 5-coordinate intermediates formed during substitution at tetrahedral Fe sites: role of bound nucleophile in labilisation of leaving group
Source: Royal Society of Chemistry journal article supplement (doi:10.1039/b706272a), 2007-01-01
Supplement: b706272a.pdf [file b706272a.pdf]

## **SUPPLEMENTARY KINETIC DATA**

### **Direct Studies on 5-Coordinate Intermediates Formed during Substitution at Tetrahedral Fe Sites: Role of Bound Nucleophile in Labilisation of Leaving Group.**

Brendan Garrett and Richard A. Henderson

**SUPPLEMENTARY DATA**

**TABLE 1**

Kinetic data for the reaction of  $[\text{FeCl}_4]^-$  (0.05 mmol dm<sup>-3</sup>) with  $[\text{4-RC}_6\text{H}_4\text{S}^-]$  in MeCN at 25 °C. Kinetics measured at  $\lambda = 500$  nm (except for 4-R = NO<sub>2</sub> which was studied at  $\lambda = 620$  nm).

| 4-R                   | [4-RC <sub>6</sub> H <sub>4</sub> S <sup>-</sup> ]<br>/ mmol dm <sup>-3</sup> | $k_{\text{obs1}} / \text{s}^{-1}$ | $k_{\text{obs2}} / \text{s}^{-1}$ |
|-----------------------|-------------------------------------------------------------------------------|-----------------------------------|-----------------------------------|
| <b>OMe</b>            | 0.1 <sup>a</sup>                                                              | 4.3                               | 1.12                              |
|                       | 0.4                                                                           | 6.7                               | 0.91                              |
|                       | 1.0                                                                           | 8.0                               | 0.99                              |
|                       | 2.5                                                                           | 12.4                              | 0.92                              |
|                       | 4.0                                                                           | 15.4                              | 0.74                              |
|                       | 6.0                                                                           | 17.1                              | 0.73                              |
|                       | 7.5                                                                           | 19.0                              | 1.04                              |
|                       | 10.0                                                                          | 22.3                              | 0.78                              |
|                       | 15.0                                                                          | 26.0                              |                                   |
|                       | 20.0                                                                          | 26.0                              |                                   |
| <b>Me</b>             | 2.5                                                                           | 4.0                               | 1.7                               |
|                       | 4.0                                                                           | 5.8                               | 1.9                               |
|                       | 5.0                                                                           | 6.5                               | 1.8                               |
|                       | 6.0                                                                           | 7.0                               | 1.4                               |
|                       | 7.5                                                                           | 8.0                               | 1.6                               |
|                       | 10.0                                                                          | 8.7                               | 1.7                               |
|                       | 15.0                                                                          | 10.0                              | 1.56                              |
|                       | 20.0                                                                          | 10.3                              | 1.54                              |
| <b>H</b>              | 0.1 <sup>a</sup>                                                              | 4.5                               | 0.42                              |
|                       | 0.15                                                                          | 6.2                               | 0.82                              |
|                       | 0.25                                                                          | 7.6                               | 0.90                              |
|                       | 0.4                                                                           | 11.0                              | 1.18                              |
|                       | 0.5                                                                           | 11.6                              | 1.38                              |
|                       | 1.0                                                                           | 14.2                              | 3.0                               |
|                       | 2.5                                                                           | 25                                | 2.9                               |
|                       | 5.0                                                                           | 29                                | 6.2                               |
|                       | 7.5                                                                           | 31                                | 7.8                               |
|                       | 10.0                                                                          | 33                                | 10.2                              |
|                       | 20.0                                                                          | 39                                | 11.6                              |
| <b>Cl</b>             | 0.1 <sup>a</sup>                                                              | 5.9                               | 1.4                               |
|                       | 0.15                                                                          | 9.3                               | 2.3                               |
|                       | 0.25                                                                          | 12.6                              | 2.7                               |
|                       | 0.4                                                                           | 19.8                              | 6.2                               |
|                       | 0.5                                                                           | 21.5                              | 6.7                               |
|                       | 1.0                                                                           | 32.0                              | 8.2                               |
|                       | 2.5                                                                           | 54.0                              | 10.5                              |
|                       | 4.0                                                                           | 67.7                              | 13.3                              |
|                       | 5.0                                                                           | 73                                | 14.6                              |
| <b>NO<sub>2</sub></b> | 0.1 <sup>a</sup>                                                              | 9.8                               |                                   |
|                       | 0.15                                                                          | 15.9                              | 5.2                               |
|                       | 0.2                                                                           | 20.6                              | 6                                 |
|                       | 0.25                                                                          | 24                                | 6.4                               |
|                       | 0.3                                                                           | 29.4                              | 9                                 |
|                       | 0.4                                                                           | 44                                | 10.5                              |
|                       | 0.5                                                                           | 47                                | 11.7                              |

|             |                                                                                                                  |     |      |
|-------------|------------------------------------------------------------------------------------------------------------------|-----|------|
|             | 1.0                                                                                                              | 72  | 14.8 |
|             | 2.5                                                                                                              | 100 | 20   |
| Footnote a: | Rate constant determined by initial slope method since reaction studied under non-pseudo first order conditions. |     |      |

**SUPPLEMENTARY DATA**

**TABLE 2**

Kinetic data for the reaction of  $[\text{Fe}_2\text{S}_2\text{Cl}_4]^{2-}$  ( $0.05 \text{ mmol dm}^{-3}$ ) with  $[\text{4-RC}_6\text{H}_4\text{S}^-]$  in MeCN at 25 °C. Kinetics measured at  $\lambda = 550 \text{ nm}$  (except for 4-R =  $\text{NO}_2$  which was studied at  $\lambda = 620 \text{ nm}$ ).

| 4-R                   | $[\text{4-RC}_6\text{H}_4\text{S}^-]$<br>/ $\text{mmol dm}^{-3}$ | $k_{\text{obs1}} / \text{s}^{-1}$ | $k_{\text{obs2}} / \text{s}^{-1}$ |
|-----------------------|------------------------------------------------------------------|-----------------------------------|-----------------------------------|
| <b>OMe</b>            | 1.0                                                              | 0.8                               | 0.08                              |
|                       | 2.5                                                              | 2.3                               | 0.08                              |
|                       | 5.0                                                              | 3.5                               | 0.10                              |
|                       | 10.0                                                             | 4.7                               | 0.15                              |
|                       | 20.0                                                             | 7.6                               | 0.29                              |
|                       | 30.0                                                             | 9.3                               | 0.37                              |
|                       | 50.0                                                             | 12.8                              | 0.6                               |
| <b>Me</b>             | 1.0                                                              | 0.9                               | 0.06                              |
|                       | 2.5                                                              | 2.2                               | 0.07                              |
|                       | 5.0                                                              | 3.2                               | 0.08                              |
|                       | 10.0                                                             | 6.1                               | 0.12                              |
|                       | 20.0                                                             | 7.9                               | 0.19                              |
|                       | 30.0                                                             | 10                                | 0.25                              |
|                       | 50.0                                                             | 11.7                              | 0.4                               |
| <b>H</b>              | 1.0                                                              | 1.2                               | 0.3                               |
|                       | 2.5                                                              | 2.1                               | 0.4                               |
|                       | 5.0                                                              | 3.4                               | 0.44                              |
|                       | 10.0                                                             | 5.4                               | 0.69                              |
|                       | 20.0                                                             | 7.4                               | 0.10                              |
|                       | 30.0                                                             | 9.6                               | 0.15                              |
|                       | 50.0                                                             | 10.5                              | 0.36                              |
| <b>Cl</b>             | 1.0                                                              | 1.44                              | 0.4                               |
|                       | 2.5                                                              | 3                                 | 0.5                               |
|                       | 5.0                                                              | 5.5                               | 0.64                              |
|                       | 10.0                                                             | 8.5                               | 0.9                               |
|                       | 20.0                                                             | 14.5                              | 1.23                              |
|                       | 30.0                                                             | 15                                | 1.7                               |
|                       | 50.0                                                             | 18.1                              | 2.3                               |
| <b>NO<sub>2</sub></b> | 1.0                                                              | 2.5                               | 0.26                              |
|                       | 2.5                                                              | 7                                 | 0.28                              |
|                       | 5.0                                                              | 14                                | 0.35                              |
|                       | 10.0                                                             | 18.5                              | 0.5                               |
|                       | 20.0                                                             | 32                                | 0.77                              |
|                       | 30.0                                                             | 33                                | 1.1                               |
|                       | 50.0                                                             | 41                                | 2.0                               |

**SUPPLEMENTARY DATA**

**TABLE 3**

Kinetic data for the reaction of  $[\{\text{MoFe}_3\text{S}_4\text{Cl}_3\}_2(\mu\text{-SEt})_3]^{2-}$  ( $0.05 \text{ mmol dm}^{-3}$ ) with  $[4\text{-RC}_6\text{H}_4\text{S}^-]$  in MeCN at  $25 \text{ }^\circ\text{C}$ . Kinetics measured at  $\lambda = 500 \text{ nm}$  (except for 4-R =  $\text{NO}_2$  which was studied at  $\lambda = 620 \text{ nm}$ ).

| 4-R                   | $[4\text{-RC}_6\text{H}_4\text{S}^-]$<br>/ $\text{mmol dm}^{-3}$ | $k_{\text{obs1}} / \text{s}^{-1}$ | $k_{\text{obs2}} / \text{s}^{-1}$ |
|-----------------------|------------------------------------------------------------------|-----------------------------------|-----------------------------------|
| <b>OMe</b>            | 0.1 <sup>a</sup>                                                 | 1.3                               | 0.15                              |
|                       | 0.5                                                              | 5.2                               | 0.70                              |
|                       | 1.0                                                              | 12.3                              | 1.3                               |
|                       | 2.5                                                              | 26.5                              | 3.0                               |
|                       | 4.0                                                              | 30.5                              | 3.7                               |
|                       | 6.0                                                              | 37.2                              | 4.4                               |
|                       | 7.5                                                              | 46.6                              | 8.0                               |
|                       | 10.0                                                             | 48.7                              | 11.0                              |
|                       | 15.0                                                             | 56.2                              | 13.0                              |
|                       | 20.0                                                             | 59.0                              | 16.4                              |
| <b>H</b>              | 0.1 <sup>a</sup>                                                 | 1.3                               | 0.23                              |
|                       | 0.5                                                              | 5.8                               | 1.4                               |
|                       | 1.0                                                              | 13.2                              | 2.2                               |
|                       | 2.5                                                              | 25.5                              | 4.4                               |
|                       | 4.0                                                              | 39.2                              | 7.5                               |
|                       | 6.0                                                              | 45.5                              | 8.2                               |
|                       | 7.5                                                              | 53.8                              | 10.5                              |
|                       | 10.0                                                             | 60.2                              | 14.5                              |
|                       | 15.0                                                             | 62                                | 16.0                              |
|                       | 20.0                                                             | 71.4                              | 16.8                              |
| <b>NO<sub>2</sub></b> | 0.1 <sup>a</sup>                                                 | 6.2                               | 1.3                               |
|                       | 0.5                                                              | 20.2                              | 5.5                               |
|                       | 1.0                                                              | 45.3                              | 9.3                               |
|                       | 2.5                                                              | 88.3                              | 12.2                              |
|                       | 4.0                                                              | 100.5                             | 24.0                              |
|                       | 6.0                                                              | 135.0                             | 32.3                              |
|                       | 7.5                                                              | 148.5                             | 35                                |
|                       | 10.0                                                             | 170.2                             | 40                                |

Footnote a: Rate constant determined by initial slope method since reaction studied under non-pseudo first order conditions.
